# Supplementary material for: A genome-scale metabolic reconstruction for Escherichia coli K-12 MG1655 that accounts for 1260 ORFs and thermodynamic information
Source: PubMed Central journal article supplement — Mol Syst Biol. 2007 Jun 26;3:121. doi: 10.1038/msb4100155 (PMC1911197; doi:10.1038/msb4100155), 2007-06-26
Supplement: msb4100155-s1.pdf [file msb4100155-s1.pdf]

## Legend to the Supplementary Material - msb4100155-s1.pdf

Feist *et al.* - A genome-scale metabolic reconstruction for *Escherichia coli* K-12 MG1655 that accounts for 1260 ORFs and thermodynamic information

1

## Supplementary Text with Tables and Figures Embedded

### Supplementary Information 1 - msb4100155-s3.xls

The content of *iAF1260* in a spreadsheet format (Microsoft Excel workbook). The file contains:

- The metabolites, reactions, thermodynamic data and references for the reconstruction.
- The reconstruction content used to generate Figure 1 with summarized lists of reactions for each COG class for each of the 6 reconstructions considered analysis of the reaction to gene ratio in *iAF1260*
- The regulatory FBA analysis parameters used to determine which reactions are not available to the network during aerobic, glucose, and aerobic + glucose minimal media conditions. Also, comments and adjustments made to the rules established by Covert *et al* (Covert *et al*, 2004).
- Results from the gene essentiality analysis comparing results using *iAF1260* and experimental screens data (Baba *et al*, 2006; Joyce *et al*, 2006).

Microsoft Excel workbook

### Supplementary Information 2 - msb4100155-s4.xls

Results comparing the predicted *in silico* carbon, nitrogen, phosphorous and sulfur sources for *E. coli* using *iAF1260* and *iJR904* and those determined experimentally (<http://www.biolog.com>). These results are summarized in Table 3. The compounds that do not have an exchange reaction in *iAF1260* and those currently not in the SimPheny database are sources for additional reconstruction expansion.

Microsoft Excel workbook

### Supplementary Information 3 - msb4100155-s5.xls

The biomass objective function used in conjunction with the constraint-based methods utilized in the project.

Microsoft Excel workbook

### Supplementary Information 4 - msb4100155-s6.zip

*iAF1260* in SBML format (level 2, version 1). See below and <http://sbml.org/documents/> for SBML format documentation.

Two SBML files are presented with the reconstruction, each containing a different flux distribution XML files

### Supplementary Information 5 - msb4100155-s7.zip

mol files (.mol) of the compounds in *iAF1260* for which mol files could be created.

Zip File - containing .mol files

### Supplementary Information 6 - msb4100155-s8.zip

Results from the comparison of the content of *iAF1260* and the EcoCyc and MetaCyc databases. The files contain mappings between the compounds and reactions in the reconstruction and databases.

Zip File - containing text files for the compound and reactions mappings, definition of analysis results (read\_me.txt) and a Microsoft Excel workbook containing the same data.

Feist *et al.* - A genome-scale metabolic reconstruction for *Escherichia coli* K-12 MG1655 that accounts for 1260 ORFs and thermodynamic information

**SBML file will contain the following reconstruction content**

- reactions (format: 'R\_<reaction abbreviation >')
  - reaction name, reversibility, reaction stoichiometry, gene-protein-reaction (GPR) association, subsystem, E.C. number
- metabolites (format: 'M\_<metabolite abbreviation>\_<compartment abbreviation>')
  - metabolite name, compartment, charge, formula (appended to the end of the name, <metabolite name>\_FORMULA)
- a flux distribution associated with a steady-state modeling simulation
  - lower bound, upper bound, objective coefficient, flux value, reduced cost

| <b>SBML File Properties</b>              |                                                                                                                |
|------------------------------------------|----------------------------------------------------------------------------------------------------------------|
| file name                                | Ec_iAF1260_flux1.xml                                                                                           |
| organism                                 | E. coli K-12 MG1655                                                                                            |
| model                                    | iAF1260                                                                                                        |
| Biomass Objective Function (BOF)         | Ec_biomass_iAF1260_core_59p81M (E. coli biomass objective function (iAF1260) - core - with 59.81 GAM estimate) |
| flux balance analysis objective          | maximize BOF                                                                                                   |
| Growth Associated Maintenance (GAM)      | 59.81 mmol ATP gDW-1                                                                                           |
| Non-Growth Associated Maintenance (NGAM) | 8.39 mmol ATP gDW-1 hr-1                                                                                       |
| media conditions                         | computational minimal media                                                                                    |
| carbon source                            | 8 mmol glucose gDw-1 hr-1                                                                                      |
| aerobic or anaerobic                     | 18.5 mmol O2 gDw-1 hr-1                                                                                        |
| <u>additional constraints</u>            |                                                                                                                |
| reactions constrained to zero            | CAT, SPODM, SPODMpp, FHL                                                                                       |
| flux split between reaction pairs        | none                                                                                                           |

| <b>SBML File Properties</b>              |                                                                                                                        |
|------------------------------------------|------------------------------------------------------------------------------------------------------------------------|
| file name                                | Ec_iAF1260_flux2.xml                                                                                                   |
| organism                                 | E. coli K-12 MG1655                                                                                                    |
| model                                    | iAF1260                                                                                                                |
| Biomass Objective Function (BOF)         | Ec_biomass_iAF1260_core_59p81M (E. coli biomass objective function (iAF1260) - core - with 59.81 GAM estimate)         |
| flux balance analysis objective          | maximize BOF                                                                                                           |
| Growth Associated Maintenance (GAM)      | 59.81 mmol ATP gDW-1                                                                                                   |
| Non-Growth Associated Maintenance (NGAM) | 8.39 mmol ATP gDW-1 hr-1                                                                                               |
| media conditions                         | computational minimal media                                                                                            |
| carbon source                            | 11.0 mmol glucose gDw-1 hr-1                                                                                           |
| aerobic or anaerobic                     | 18.2 mmol O2 gDw-1 hr-1                                                                                                |
| <u>additional constraints</u>            |                                                                                                                        |
| reactions constrained to zero            | 152 reactions identified to be unavailable to the cell under glucose aerobic conditions                                |
| flux split between reaction pairs        | NDH-1:NDH-2 is 1:1 (3 pairs of reactions - different quinone usage)<br>NADH10:NADH17pp, NADH5:NADH16pp, NADH9:NADH18pp |

Feist *et al.* - A genome-scale metabolic reconstruction for *Escherichia coli* K-12 MG1655 that accounts for 1260 ORFs and thermodynamic information

## References

Baba T, Ara T, Hasegawa M, Takai Y, Okumura Y, Baba M, Datsenko KA, Tomita M, Wanner BL, Mori H (2006) Construction of *Escherichia coli* K-12 in-frame, single-gene knockout mutants: the Keio collection. *Mol Syst Biol* **2**: 2006.0008.

Covert MW, Knight EM, Reed JL, Herrgard MJ, Palsson BO (2004) Integrating high-throughput and computational data elucidates bacterial networks. *Nature* **429**: 92-96.

Joyce AR, Reed JL, White A, Edwards R, Osterman A, Baba T, Mori H, Lesely SA, Palsson BO, Agarwalla S (2006) Experimental and Computational Assessment of Conditionally Essential Genes in *Escherichia coli*. *J Bacteriol* **188**: 8259-8271.
